# Supplementary material for: [Ag71(S-tBu)31(Dppm)](SbF6)2: an intermediate-sized metalloid silver nanocluster containing a building block of Ag64
Source: Royal Society of Chemistry journal article supplement (doi:10.1039/d1cc04934h), 2021-01-01
Supplement: d1cc04934h1.pdf [file d1cc04934h1.pdf]

## Supporting Information

### **[Ag<sub>71</sub>(S-tBu)<sub>31</sub>(Dppm)](SbF<sub>6</sub>)<sub>2</sub>: an intermediate sized metalloid silver nanocluster containing a building block of Ag<sub>64</sub>**

Manman Zhou,<sup>†</sup> Yizheng Bao,<sup>†</sup> Shan Jin,\* Shuaishuai Wen, Shuang Chen, Manzhou Zhu\*

Institutes of Physical Science and Information Technology, Anhui University, Hefei, Anhui, 230601, P. R. China; Key Laboratory of Structure and Functional Regulation of Hybrid Materials (Anhui University), Ministry of Education, Hefei, 230601, P. R.

#### **1.1 Chemicals Materials**

Silver nitrate (AgNO<sub>3</sub>, 99.0%, Sigma-Aldrich), Sodium borohydride (NaBH<sub>4</sub>, 98%, Sigma-Aldrich), Sodium borodeuteride (NaBD<sub>4</sub>, 98%, Sigma-Aldrich) bis-(diphenylphosphino)methane (Dppm, 98%), t-butyl mercaptan (97%, Sigma-Aldrich), Tetraphenylboron sodium (NaBPh<sub>4</sub>, 98%), Sodium hexafluoroantimonate (NaSbF<sub>6</sub>, 99%, Energy Chemical) methanol (CH<sub>3</sub>OH, HPLC, Aldrich), Toluene (Tol, HPLC grade, Aldrich), n-hexane (Hex, HPLC grade, Aldrich), dichloromethane (CH<sub>2</sub>Cl<sub>2</sub>, HPLC grade, Aldrich). All reagents were used as received without further purification.

#### **1.2 The Synthesis of Ag<sub>71</sub>(SR)<sub>31</sub>(Dppm)(SbF<sub>6</sub>)<sub>2</sub>**

For the synthesis of nanocluster, 60 mg AgNO<sub>3</sub> was dissolved in 1 mL of H<sub>2</sub>O, then added into 14 mL toluene. After this solution stirred for 10 min, 50 mg bis-(diphenylphosphino)methane and 50 ul t-butyl mercaptan were added together to the solution under vigorous stirring. The clear and transparent solution gradually turned milky white. 15 minutes later, a freshly prepared solution of 20 mg NaBH<sub>4</sub> (1 mL H<sub>2</sub>O) was added. After 3-5 min, the color of the reaction solution turned to red. The reaction sustained for 5 h at room temperature. The crude product was spied dry then dissolved in 1 mL CH<sub>2</sub>Cl<sub>2</sub>. 30 mg NaSbF<sub>6</sub> in 3 mL CH<sub>3</sub>OH was added to replace the anion of the cluster for easy crystallization. The precipitate washed several times with CH<sub>3</sub>OH and H<sub>2</sub>O. Red crystals were crystallized for CH<sub>2</sub>Cl<sub>2</sub>/hexane 2-3 days later. The yield is about 30% based on the Ag element for Ag<sub>71</sub>(SR)<sub>31</sub>(Dppm)(SbF<sub>6</sub>)<sub>2</sub>.

Ag<sub>71</sub>(SR)<sub>31</sub>(Dppm)(BPh<sub>4</sub>)<sub>2</sub> was crystalized by adding NaBPh<sub>4</sub> to replace the anion of the cluster, which was further used for NMR measure.

#### **1.3 Characterization**

All UV/Vis absorption spectra of nanoclusters were recorded using an Agilent 8453. Thermo gravimetric analysis (TGA) was carried out on a thermo gravimetric analyzer (DTG-60H, Shimadzu Instruments, Inc.) with 5 mg of the nanocluster in a SiO<sub>2</sub> pan at a heating rate of 10 K min<sup>-1</sup> from 323 K to 973 K. X-ray photoelectron spectroscopy (XPS) measurements were performed on a Thermo ESCALAB 250 configured with a mono chromated AlK $\alpha$  (1486.8 eV) 150W X-ray source, 0.5 mm circular spot size, a flood gun to counter charging effects, and the analysis chamber base pressure lower than 1 x 10<sup>-9</sup> mbar, data were collected with FAT= 20 eV. Electrospray ionization time-of-flight mass spectrometry (ESI-TOF-MS) measurement was performed by MicroTOF-QIII high-resolution mass spectrometer. The sample was directly infused into the chamber at 5 $\mu$ L/min. Nuclear magnetic resonance (NMR) analysis was performed on a Bruker Avance spectrometer operating at 400 MHz for NMR. CD<sub>2</sub>Cl<sub>2</sub> was used as the solvent

to dissolve ~50 mg  $[\text{Ag}_{71}(\text{SR})_{31}(\text{Dppm})][\text{BPh}_4]_2$  clusters; the residual solvent peak (i.e., 1H at 5.32 ppm) was used as reference.

#### 1.4 Electrochemical measurements

Electrochemical measurements were performed with an electrochemical workstation (CHI700E) using a Pt working electrode (diameter 0.4 mm), a Pt wire counter electrode, and a Ag wire quasireference electrode in 0.1  $\text{MBu}_4\text{NPF}_6\text{-CH}_2\text{Cl}_2$ . Prior to use, the working electrode was polished with 0.05  $\mu\text{m}$   $\text{Al}_2\text{O}_3$  slurries and then cleaned by sonication in dilute  $\text{CH}_3\text{CH}_2\text{OH}$  and nanopure water successively. The electrolyte solution was deaerated with ultra-highpurity nitrogen for 30 min and blanketed under nitrogen atmosphere throughout the experimental procedure.

#### 1.5 X-Ray Crystallography

The data collection for single crystal X-ray diffraction was carried out on Stoe Stadivari diffractometer under liquid nitrogen flow at 173 K, using graphite-monochromatized  $\text{Cu K}\alpha$  radiation ( $\lambda = 1.54186 \text{ \AA}$ ). Data reductions and absorption corrections were performed using the SAINT and SADABS programs, respectively.

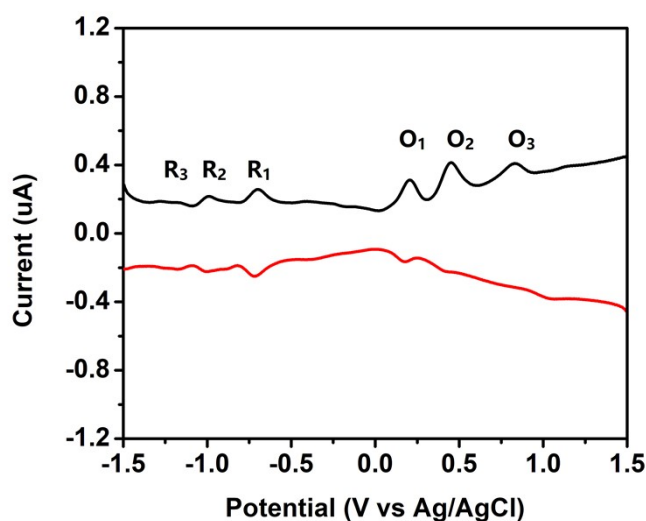

**Figure S1.** Differential pulse voltammogram of  $[\text{Ag}_{71}(\text{SR})_{31}(\text{Dppm})](\text{SbF}_6)_2$  in  $\text{CH}_2\text{Cl}_2$  in the low temperature environment formed by dry ice in acetonitrile.

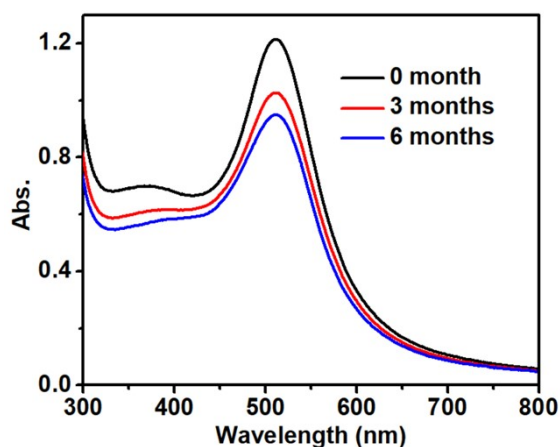

**Figure S2.** the UV-vis of  $[\text{Ag}_{71}(\text{SR})_{31}(\text{Dppm})](\text{SbF}_6)_2$  stored in solid states for 0, 3 and 6 months.

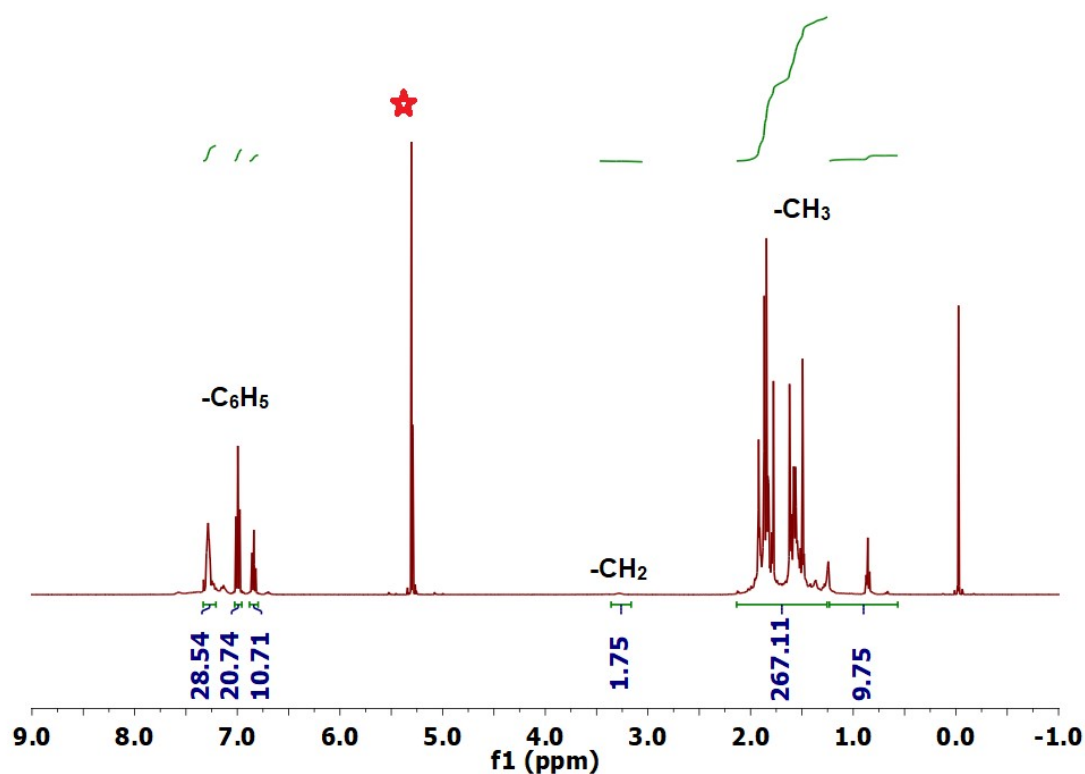

**Figure S3.**  $^1\text{H}$ NMR spectra of the  $[\text{Ag}_{71}(\text{SR})_{31}(\text{Dppm})][\text{BPh}_4]_2$  clusters dissolved in  $\text{CD}_2\text{Cl}_2$ . The residual solvent peak (i.e.,  $^1\text{H}$  at 5.32 ppm) was used as reference.

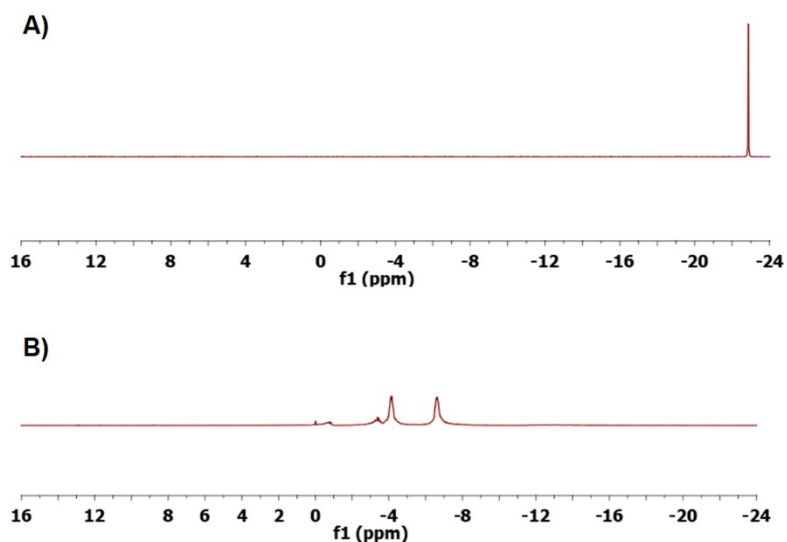

**Figure S4.**  $^{31}\text{P}$ NMR spectra of the A) free Dppm and B) 50mg  $[\text{Ag}_{71}(\text{SR})_{31}(\text{Dppm})][\text{BPh}_4]_2$  clusters dissolved in  $\text{CD}_2\text{Cl}_2$ .

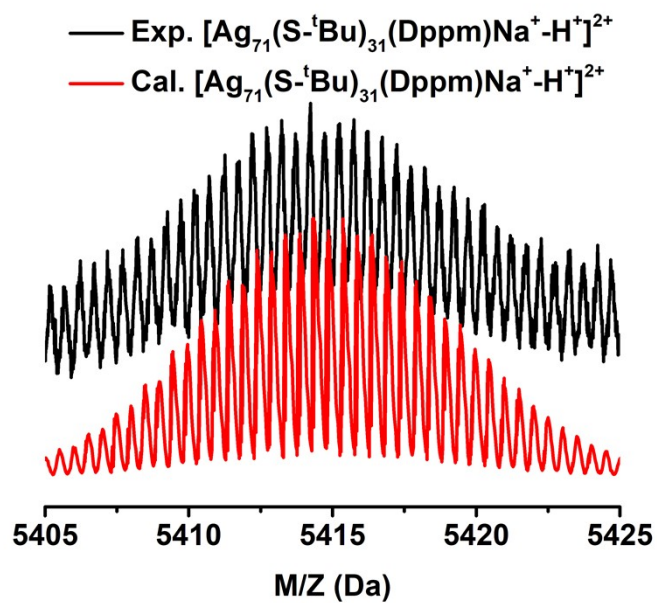

Figure S5. Comparison of the calculated and the experimental isotopic distributions of  $[\text{Ag}_{71}(\text{S}^{\text{-tBu}})_{31}(\text{Dppm})\text{Na}^+ \cdot \text{H}^+]^{2+}$

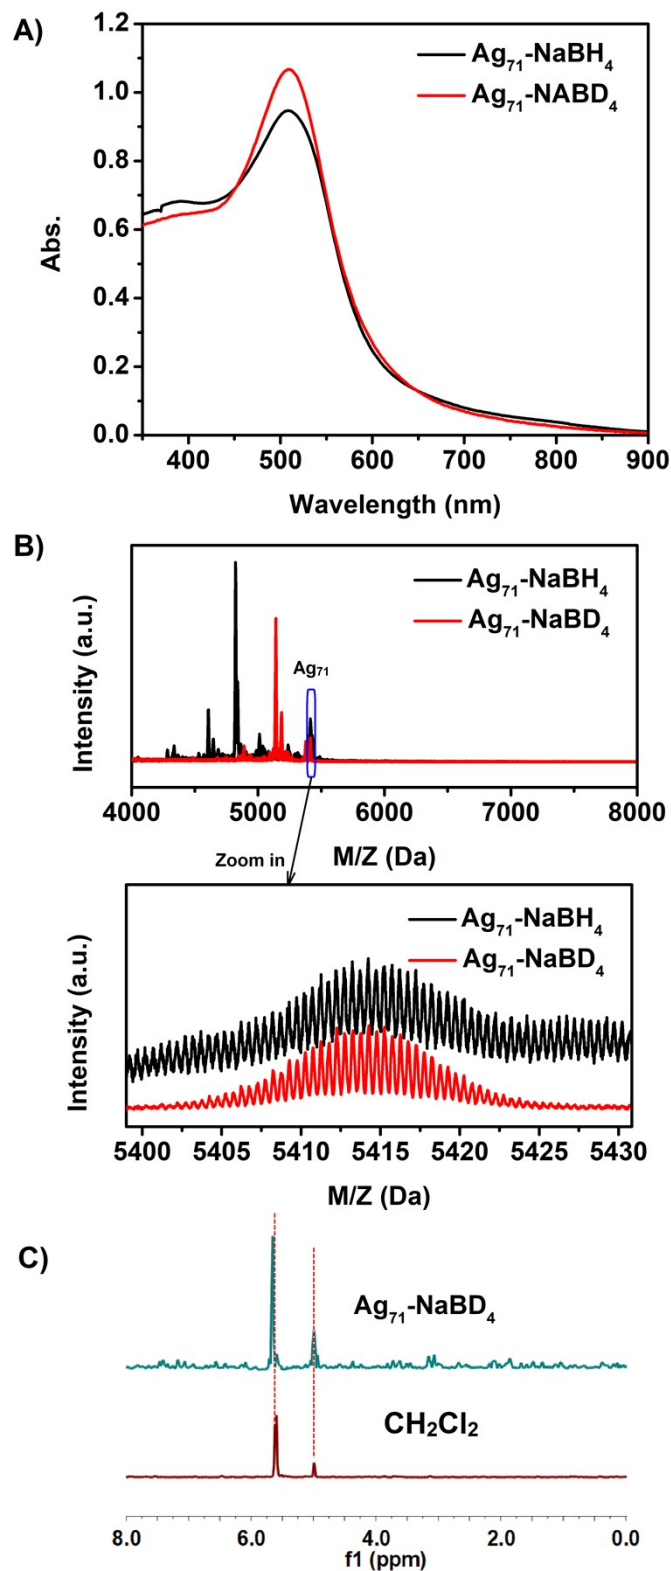

**Figure S6.** A) the UV-vis spectrum of  $[Ag_{71}(SR)_{31}(Dppm)][BPh_4]_2$  synthesized via  $NaBH_4$  and  $NaBD_4$ . B) the comparison of ESI-MS spectra between the products from  $NaBH_4$  and  $NaBD_4$ ; C)  $^2H$ NMR spectra of the  $[Ag_{71}(SR)_{31}(Dppm)][BPh_4]_2$  clusters dissolved in  $CH_2Cl_2$  and the purified  $CH_2Cl_2$ . The result indicated there was no additional signal in spectra, meaning that no D atom was incorporated into  $Ag_{71}-D$ , ruling out the existence of hydrides ( $H^-$ ) in the structure.

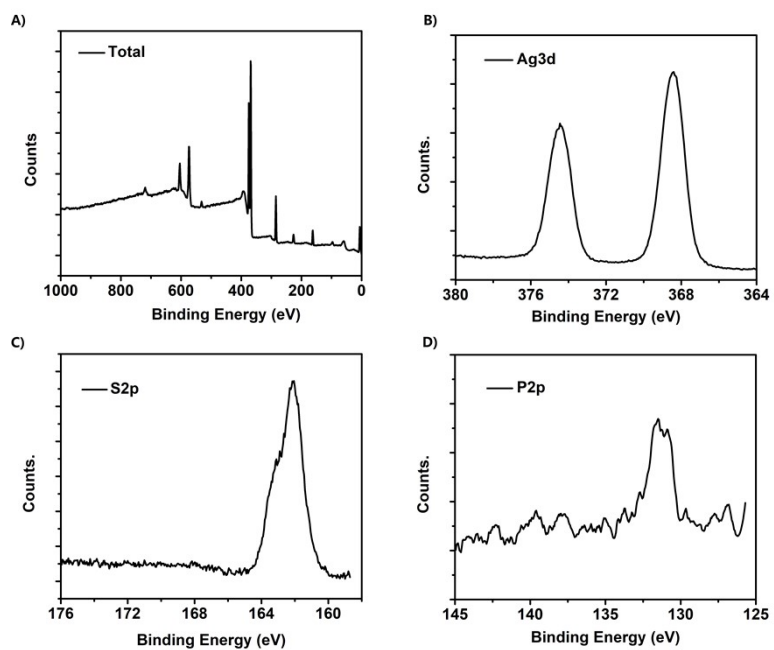

**Figure S7.** X-ray photoelectron spectroscopy (XPS) data of  $[\text{Ag}_{71}(\text{SR})_{31}(\text{Dppm})](\text{SbF}_6)_2$ .

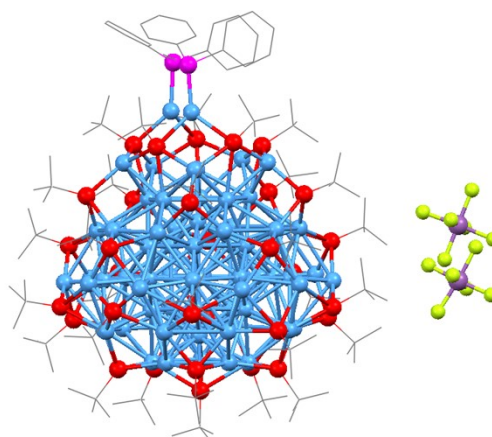

**Figure S8.** The structure of  $[\text{Ag}_{71}(\text{SR})_{31}(\text{Dppm})](\text{SbF}_6)_2$  Color Labels: light blue = Ag; red = S; pink = P; purple = Sb; yellow-green = F; gray = C, .

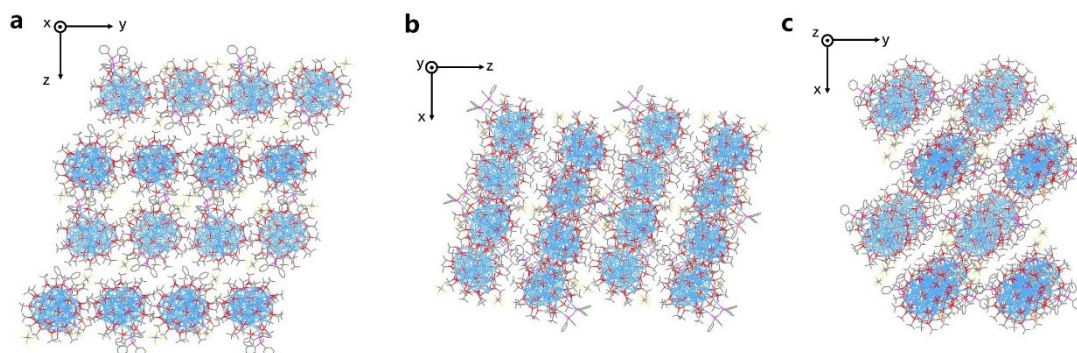

**Figure S9.** The packing model of  $[\text{Ag}_{71}(\text{SR})_{31}(\text{Dppm})](\text{SbF}_6)_2$  from different views. Color Labels: light blue = Ag; red = S; pink = P; gray = C.

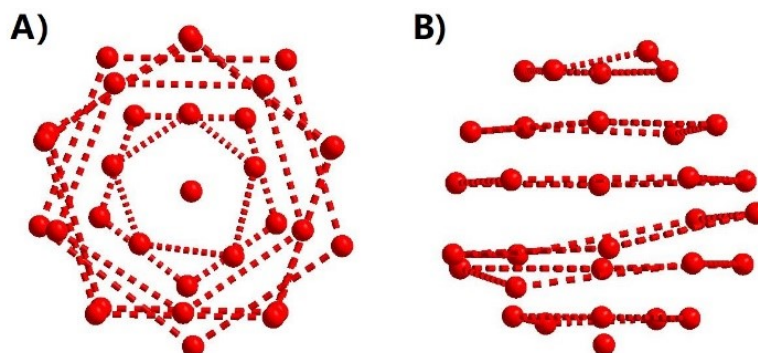

**Figure S10.** The arrangement of thiol ligands in the  $[\text{Ag}_{71}(\text{SR})_{31}(\text{Dppm})]^{2+}$ . Five thiol ligands in each layer could form a pentagon. There are five twisted pentagons and one sole thiol ligand. The arrangement was rarely observed in the reported nanoclusters.

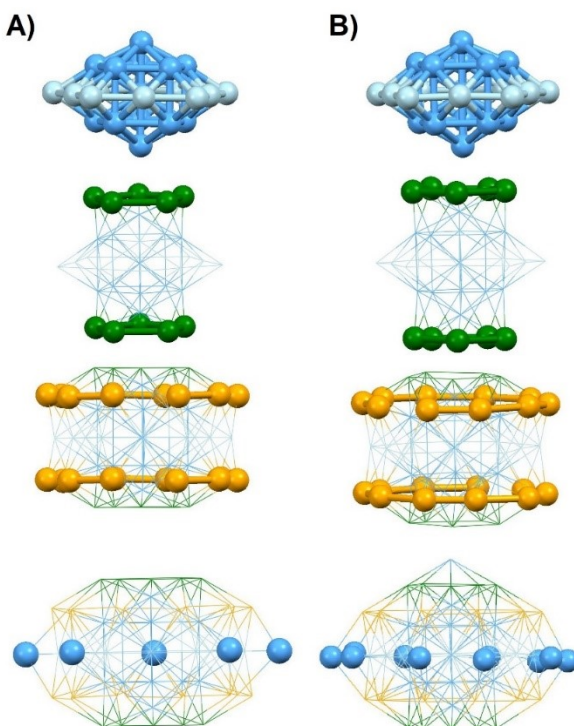

**Figure S11.** the comparison of A)  $\text{Ag}_{58}$  core structure of the  $[\text{Ag}_{78}(\text{iPrPhS})_{30}(\text{dppm})_{10}\text{Cl}_{10}]^{4+}$  and B)  $\text{Ag}_{64}$  core structure of  $[\text{Ag}_{71}(\text{SR})_{31}(\text{Dppm})]^{2+}$ .

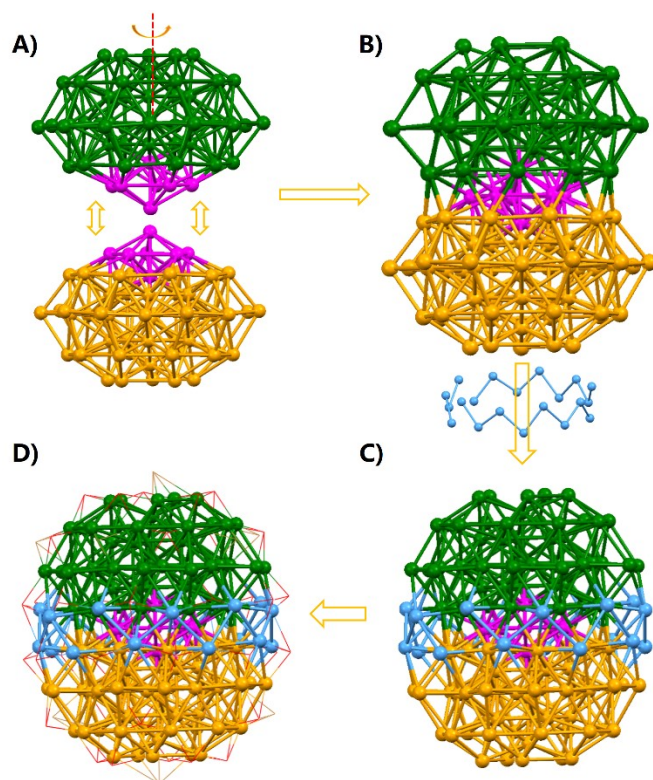

**Figure S12.** the structural analysis of  $\text{Ag}_{141}$  via  $\text{Ag}_{64}$  unit assembled, which the  $\text{Ag}_{64}$  structure could be observed in  $\text{Ag}_{71}(\text{S}^t\text{Bu})_{31}(\text{Dppm})[(\text{SbF}_6)_2]$ .

Table 1. Crystal data and structure refinement for  $\text{Ag}_{71}$ .

|                        |                                                                                             |
|------------------------|---------------------------------------------------------------------------------------------|
| Empirical formula      | $\text{C}_{149}\text{H}_{301}\text{Ag}_{71}\text{F}_{12}\text{P}_2\text{S}_{31}\text{Sb}_2$ |
| Formula weight         | 11278.95                                                                                    |
| Temperature/K          | 173(2)                                                                                      |
| Crystal system         | triclinic                                                                                   |
| Space group            | P-1                                                                                         |
| $a/\text{\AA}$         | 24.7024(15)                                                                                 |
| $b/\text{\AA}$         | 33.182(2)                                                                                   |
| $c/\text{\AA}$         | 38.8512(18)                                                                                 |
| $\alpha/^\circ$        | 102.791(3)                                                                                  |
| $\beta/^\circ$         | 103.733(2)                                                                                  |
| $\gamma/^\circ$        | 90.602(3)                                                                                   |
| Volume/ $\text{\AA}^3$ | 30100(3)                                                                                    |



|                                                  |                                                                 |
|--------------------------------------------------|-----------------------------------------------------------------|
| Z                                                | 4                                                               |
| Radiation                                        | CuK $\alpha$ ( $\lambda = 1.54186$ )                            |
| 2 $\Theta$ range for data collection/ $^{\circ}$ | 2.736 to 135                                                    |
| Index ranges                                     | $-29 \leq h \leq 29, -39 \leq k \leq 38, -43 \leq l \leq 46$    |
| Reflections collected                            | 363852                                                          |
| Independent reflections                          | 108067 [ $R_{\text{int}} = 0.0721, R_{\text{sigma}} = 0.1060$ ] |
| Data/restraints/parameters                       | 108067/19/4940                                                  |
| Goodness-of-fit on $F^2$                         | 1.079                                                           |
| Final R indexes [ $I \geq 2\sigma(I)$ ]          | $R_1 = 0.0458, wR_2 = 0.0805$                                   |
| Final R indexes [all data]                       | $R_1 = 0.0676, wR_2 = 0.0941$                                   |
| Largest diff. peak/hole / $e \text{ \AA}^{-3}$   | 4.18/-4.65                                                      |
